# Supplementary material for: Epidemiology of combined clavicle and rib fractures: a systematic review
Source: Springer Nature journal article supplement (doi:10.1007/s00068-021-01701-4), 2021-06-01
Supplement: MOESM1 [file 19221658]

## **Appendix 1. Search terms**

### **MEDLINE:**

(clavicle[MeSH] OR clavic\* OR (collar AND bone))

AND

((“rib fractures”[MeSH] OR ((rib OR costal)) OR (((chest OR thoracic) AND wall)) AND (fractur\* OR injur\*))

OR

(costoclavicular AND (fractur\* OR injur\*))

### **EMBASE:**

(clavic\*:ti,ab OR (collar:ti,ab AND bone:ti,ab))

AND

(rib:ti,ab OR costal:ti,ab OR ((chest:ti,ab OR thoracic:ti,ab) AND wall:ti,ab)) AND (fractur\*:ti,ab OR injur\*:ti,ab)

OR

(costoclavicular:ti,ab AND (fractur\*:ti,ab OR injur\*:ti,ab))

### **CENTRAL:**

(clavic\* OR (collar AND bone))

AND

((rib OR costal) OR ((chest OR thoracic) AND wall) AND (fractur\* OR injur\*))

OR

(costoclavicular AND (fractur\* OR injur\*))
